# Supplementary material for: Muscovite nanoparticles mitigate neuropathic pain by modulating the inflammatory response and neuroglial activation in the spinal cord
Source: PubMed Central journal article supplement — Neural Regen Res. 2020 May 11;15(11):2162–8. doi: 10.4103/1673-5374.282260 (PMC7716045; doi:10.4103/1673-5374.282260), 2020-05-11
Supplement: NRR-15-2162_Suppl1.pdf [file NRR-15-2162_Suppl1.pdf]

## OPEN PEER REVIEW REPORT 1

**Name of journal:** Neural Regeneration Research

**Manuscript NO:** NRR-D-19-00626

**Title:** Muscovite nanoparticles mitigate neuropathic pain by modulating the inflammatory response and neuroglial activation in the spinal cord

**Reviewer's Name:** Ana Maria Blanco Martinez

**Reviewer's country:** Brazil

**Date sent for review:** 2019-10-31

### COMMENTS TO AUTHORS

The authors explored the analgesic effects of "muscovite" after a partial nerve ligation. The manuscript deals with a very important issue, since neuropathic pain is a major health problem worldwide. The manuscript is well designed and the results are interesting. There are, however, minor points that should be addressed by the authors:

1. In the abstract it is written that "muscovite .... has been used as an pro-inflammatory agent....".

Please check if this is correct;

2. In the methodology section for drug administration more information should be given for the drug such as source, preparation etc;

3. In the results sections please consider changing the orientation of the quantification graphs.
